# Supplementary material for: Multiple hybridization events, polyploidy and low postmating isolation entangle the evolution of neotropical species of Epidendrum (Orchidaceae)
Source: PubMed Central journal article supplement (PMC3927766; doi:10.1186/1471-2148-14-20), 2014-02-04

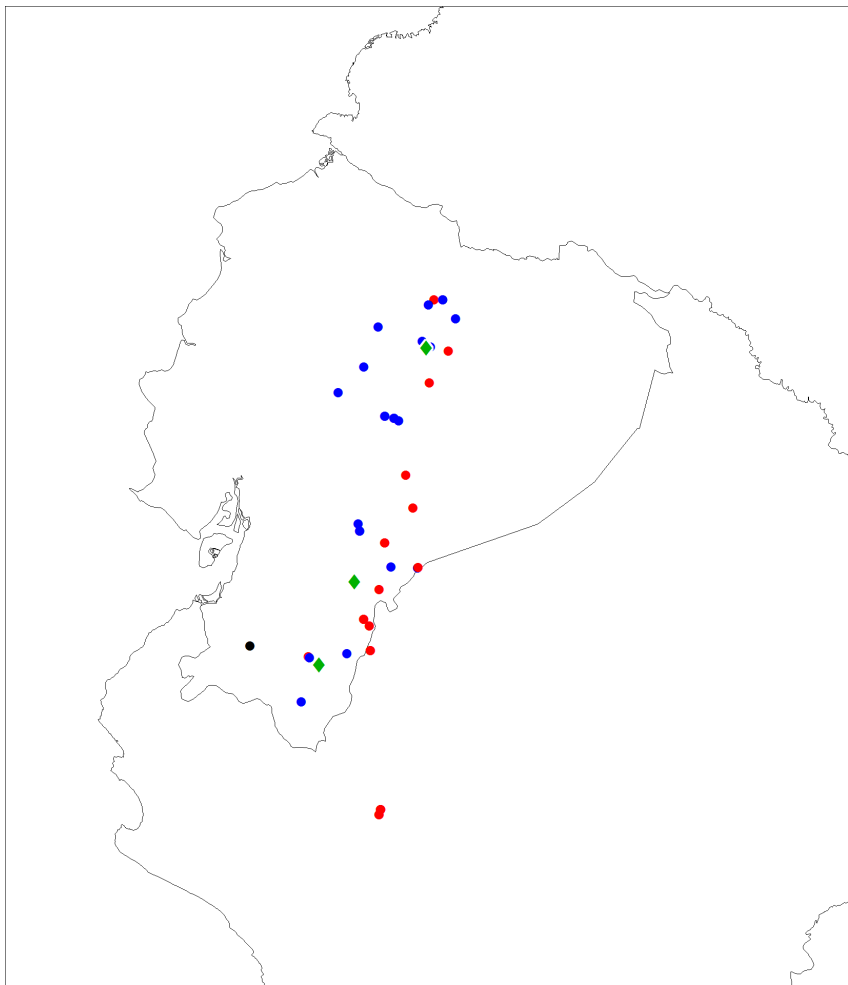

Supplement: 1471-2148-14-20-S5.pdf [file 1471-2148-14-20-S5.pdf]
